# Supplementary material for: Timing of Initiation of Antiretroviral Drugs during Tuberculosis Therapy
Source: Atypon-hosted journal article supplement (doi:10.1056/nejmoa0905848), 2010-02-24
Supplement: nejm_abdool_karim_697sa1.pdf [file nejm_abdool_karim_697sa1.pdf]

## Supplementary Appendix

This appendix has been provided by the authors to give readers additional information about their work.

Supplement to: Abdool Karim SS, Naidoo K, Grobler A, et al. Timing of initiation of antiretroviral drugs during tuberculosis therapy. *N Engl J Med* 2010;362:697-706.

**Supplementary Table:** Grade 3 and 4 adverse events in the SAPiT trial

| Adverse Event Category                                     | Integrated Treatment Arms                            | Sequential treatment Arm                             |
|------------------------------------------------------------|------------------------------------------------------|------------------------------------------------------|
|                                                            | # of adverse events<br>(# of serious adverse events) | # of adverse events<br>(# of serious adverse events) |
| Person years of follow-up                                  | 466                                                  | 222                                                  |
| Number of participants                                     | 429                                                  | 213                                                  |
| <b>Death – unknown cause</b>                               | 14 (14)                                              | 13 (13)                                              |
| <b>Elective hospitalization</b>                            | 7 (7)                                                | 5 (5)                                                |
| <b>Extrapulmonary tuberculosis</b>                         | 3 (3)                                                | 0 (0)                                                |
| <b>Skin and subcutaneous tissue disorders</b>              |                                                      |                                                      |
| Rash                                                       | 3 (1)                                                | 4 (1)                                                |
| Cellulitis                                                 | 1 (1)                                                | 0 (0)                                                |
| Incision site abscess                                      | 1 (1)                                                | 0 (0)                                                |
| Herpes Zoster virus                                        | 2 (0)                                                | 2 (0)                                                |
| Molluscum contagiosum                                      | 1 (0)                                                | 0 (0)                                                |
| <b>Blood and lymphatic system disorders</b>                |                                                      |                                                      |
| Lymphadenopathy                                            | 11 (4)                                               | 0 (0)                                                |
| Pancytopenia                                               | 1 (1)                                                | 0 (0)                                                |
| Thrombocytopenia                                           | 2 (2)                                                | 1 (1)                                                |
| Anaemia                                                    | 6 (4)                                                | 2 (0)                                                |
| Post procedural haematoma                                  | 1 (1)                                                | 0 (0)                                                |
| <b>Gastrointestinal and hepatobiliary system disorders</b> |                                                      |                                                      |
| Gastrointestinal abnormalities                             | 8 (4)                                                | 3 (3)                                                |
| Liver abnormalities                                        | 36 (17)                                              | 8 (4)                                                |
| <b>Central nervous system</b>                              |                                                      |                                                      |
| Meningitis: cryptococcal                                   | 6 (6)                                                | 2 (2)                                                |
| Meningitis Tuberculous                                     | 5 (5)                                                | 0 (0)                                                |
| Meningitis unspecified                                     | 0 (0)                                                | 4 (4)                                                |
| Peripheral Neuropathy                                      | 6 (0)                                                | 1 (0)                                                |
| Neuropsychiatric                                           | 7 (2)                                                | 2 (2)                                                |
| Other central nervous system                               | 6 (5)                                                | 6 (5)                                                |
| <b>Respiratory system disorders</b>                        |                                                      |                                                      |
| Pneumocystis jiroveci pneumonia                            | 2 (1)                                                | 4 (3)                                                |
| Bacterial pneumonia                                        | 0 (0)                                                | 1 (0)                                                |
| Pneumonia unspecified                                      | 17 (11)                                              | 7 (6)                                                |
| Tuberculosis                                               | 8 (6)                                                | 12 (11)                                              |
| Other respiratory                                          | 23 (8)                                               | 3 (1)                                                |
| <b>Cardiac disorders</b>                                   |                                                      |                                                      |
| Cardiac arrhythmias                                        | 1 (1)                                                | 0 (0)                                                |
| Congestive cardiac failure                                 | 1 (0)                                                | 0 (0)                                                |

|                                                            |                  |                |
|------------------------------------------------------------|------------------|----------------|
| Cardiomyopathy                                             | 1 (1)            | 0 (0)          |
| <b>Genital urinary system disorders</b>                    |                  |                |
| Cervicitis                                                 | 1 (0)            | 0 (0)          |
| Cervical dysplasia                                         | 0 (0)            | 1 (0)          |
| Haematuria                                                 | 0 (0)            | 1 (0)          |
| Renal Failure                                              | 1 (1)            | 1 (1)          |
| Metrorrhagia                                               | 3 (1)            | 1 (0)          |
| Urine retention                                            | 1 (0)            | 0 (0)          |
| <b>Electrolyte and fluid volume abnormalities</b>          |                  |                |
| Hyperuricaemia                                             | 0 (0)            | 1 (0)          |
| Hyperglycaemia                                             | 1 (0)            | 0 (0)          |
| Increased creatinine                                       | 1 (1)            | 0 (0)          |
| Hyponatraemia                                              | 1 (1)            | 0 (0)          |
| Hypocalcaemia                                              | 1 (1)            | 0 (0)          |
| Metabolic acidosis                                         | 1 (1)            | 0 (0)          |
| <b>Muscular skeletal disorders</b>                         |                  |                |
| Muscular weakness                                          | 1 (0)            | 0 (0)          |
| Facial bone fracture                                       | 1 (1)            | 0 (0)          |
| Clavicle fracture                                          | 1 (1)            | 0 (0)          |
| Road traffic accident                                      | 0 (0)            | 2 (2)          |
| Wasting                                                    | 4 (3)            | 0 (0)          |
| <b>Neoplasms</b>                                           |                  |                |
| Carcinoma Cervix                                           | 0 (0)            | 1 (1)          |
| Kaposi's sarcoma                                           | 1 (0)            | 0 (0)          |
| Glioma                                                     | 0 (0)            | 1 (1)          |
| <b>Eye abnormalities</b>                                   |                  |                |
| Cataract                                                   | 1 (1)            | 0 (0)          |
| Unilateral blindness                                       | 0 (0)            | 1 (0)          |
| <b>Vascular system disorders</b>                           |                  |                |
| Deep Vein Thrombosis                                       | 2 (2)            | 0 (0)          |
| Epistaxis                                                  | 0 (0)            | 1 (0)          |
| <b>Infections and infestations not elsewhere specified</b> |                  |                |
| Schistosomiasis                                            | 1 (0)            | 0 (0)          |
| Chronic Otitis media                                       | 0 (0)            | 1 (1)          |
| <b>Metabolism and nutrition disorders</b>                  |                  |                |
| Non Insulin Dependent Diabetes Mellitus                    | 1 (0)            | 0 (0)          |
| Dehydration                                                | 2 (2)            | 0 (0)          |
| <b>Total</b>                                               | <b>206 (122)</b> | <b>92 (67)</b> |
